# Supplementary material
Source: PubMed Central journal article supplement (PMC9378355)

**Supplementary Figure. Additional reasons for driving reduction in the past 6 months, among those reporting reductions (N=16 pre-COVID-19; N=167 during COVID-19).** Lines represent percent reporting  $\pm$  standard error

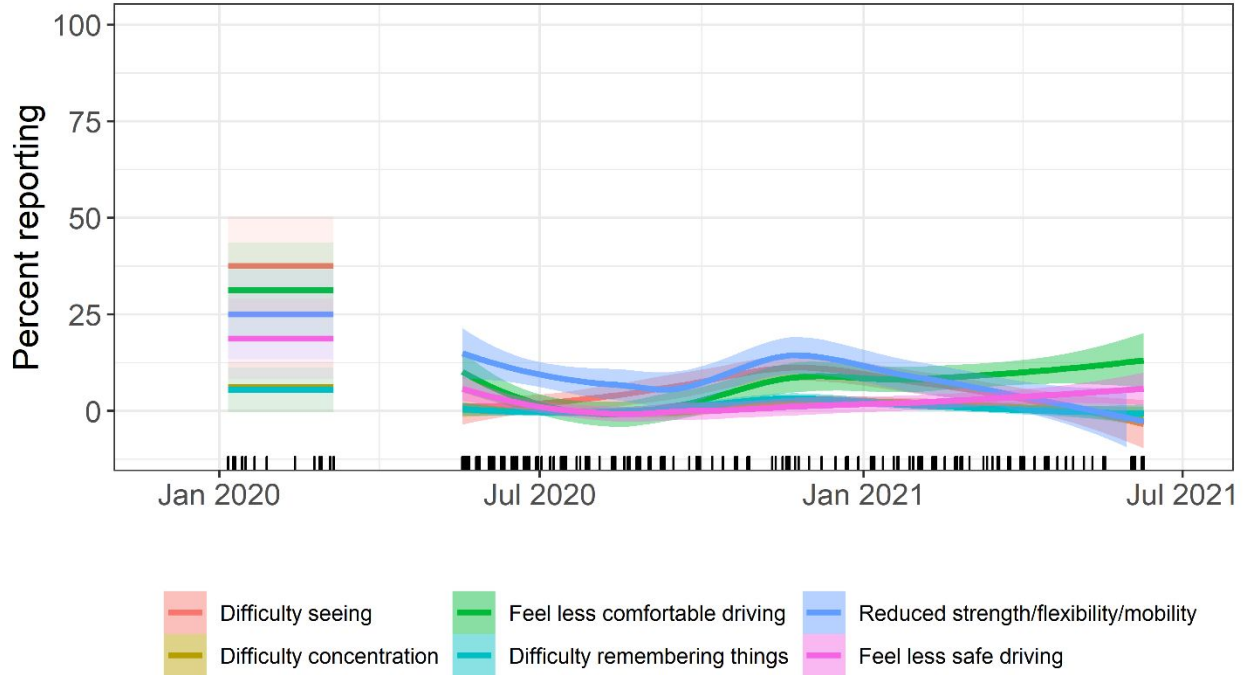

Supplement: NIHMS1790065-supplement-1.pdf [file NIHMS1790065-supplement-1.pdf]
